## **Zebrafish spinal cord repair is accompanied by transient tissue stiffening**

Stephanie Möllmert<sup>1</sup>, Maria A. Kharlamova<sup>1</sup>, Tobias Hoche<sup>1</sup>, Anna V. Taubenberger<sup>1</sup>,  
Shada Abuhattum<sup>1,3,4</sup>, Veronika Kuscha<sup>2</sup>, Thomas Kurth<sup>2</sup>, Michael Brand<sup>2</sup>, Jochen  
Guck<sup>1,4\*</sup>

<sup>1</sup>Biotechnology Center, Technische Universität Dresden, Tatzberg 47/49, 01307  
Dresden, Germany

<sup>2</sup>Center for Regenerative Therapies, Technische Universität Dresden, Fetscherstraße  
105, 01307 Dresden, Germany

<sup>3</sup>JPK Instruments AG, Colditzstraße 34-36, Berlin 12099, Germany

<sup>4</sup>Max Planck Institut for the Science of Light & Max-Planck Institut für Physik und  
Medizin, Staudtstraße 2, 91058 Erlangen, Germany

\*jochen.guck@mpl.mpg.de

**Keywords:** atomic force microscopy, elasticity, mechanical properties, tissue  
mechanics, mechanosensing, zebrafish, spinal cord, regeneration

1 **Abstract**

2 Severe injury to the mammalian spinal cord results in permanent loss of function due  
3 to the formation of a glial-fibrotic scar. Both the chemical composition and the  
4 mechanical properties of the scar tissue have been implicated to inhibit neuronal  
5 regrowth and functional recovery. By contrast, adult zebrafish are able to repair  
6 spinal cord tissue and restore motor function after complete spinal cord transection  
7 owing to a complex cellular response that includes neurogenesis and axon regrowth.  
8 The mechanical mechanisms contributing to successful spinal cord repair in adult  
9 zebrafish are, however, currently unknown. Here, we employ AFM-enabled nano-  
10 indentation to determine the spatial distributions of apparent elastic moduli of living  
11 spinal cord tissue sections obtained from uninjured zebrafish and at distinct time  
12 points after complete spinal cord transection. In uninjured specimens, spinal gray  
13 matter regions were stiffer than white matter regions. During regeneration after  
14 transection, the spinal cord tissues displayed a significant increase of the respective  
15 apparent elastic moduli that transiently obliterated the mechanical difference  
16 between the two types of matter, before returning to baseline values after completion  
17 of repair. Tissue stiffness correlated variably with cell number density,  
18 oligodendrocyte interconnectivity, axonal orientation, and vascularization. The  
19 presented work constitutes the first quantitative mapping of the spatio-temporal  
20 changes of spinal cord tissue stiffness in regenerating adult zebrafish and provides  
21 the tissue mechanical basis for future studies into the role of mechanosensing in  
22 spinal cord repair.

## 23 **Introduction**

24 The spinal cord contains neurons and glia that act collectively to transmit sensory  
25 information from the peripheral nervous system to the brain, and motor commands  
26 from the brain to the periphery of the body evoking both voluntary and involuntary  
27 movements. After traumatic spinal cord injury in mammals, this information exchange  
28 is irreversibly impaired due to the immediate disruption of axonal projections,  
29 neuronal cell death and the eventual formation of a glial-fibrotic scar [1-4]. The scar  
30 tissue not only inhibits axonal regrowth across the lesion site due to its biochemical  
31 composition [4], but has also been proposed to act as a mechanical impediment [2].  
32 Analogous to SCI in mammalian systems, traumatic spinal cord injury in zebrafish  
33 entails the immediate loss of function caudal to the lesion site [5, 6]. However, the  
34 absence of voluntary body movements caudal to the injury level is, in contrast to  
35 mammalian paralysis, not permanent [5, 6]. Zebrafish respond to spinal cord injury by  
36 a complex cellular response including proliferation [7-9], migration [10], differentiation  
37 [8, 9, 11] and morphological changes [8, 9]. New motor neurons originating from  
38 proliferating radial glial cells mature and eventually form synaptic connections [8].  
39 Severed axons that descend from the brainstem regrow, traverse the injury site and  
40 innervate the caudal spinal cord [7, 12]. Fibroblast-like cells accumulate in the injury  
41 site, secrete collagen XII and thereby contribute to an ECM that is growth promoting  
42 for axons [13]. These processes restore the spinal cord tissue and facilitate functional  
43 recovery in adult zebrafish within 6-8 weeks post-injury [8].

44 Morphological changes, proliferation, migration and differentiation also constitute  
45 responses that mechanosensitive neurons and glia exhibit when exposed to distinct  
46 mechanical environments [14-17]. *In vitro* studies of neural cells reported an  
47 increased branching of neurons on compliant, but directed axonal growth on stiff  
48 substrates [14, 18]. Astrocytes and microglia display morphological characteristics of  
49 an activated phenotype and upregulate inflammatory genes and proteins when  
50 exposed to a mechanical stimulus that deviates from their physiological mechanical

51 environment both *in vitro* and *in vivo* [17]. Oligodendrocyte precursor cells increase  
52 their expression of myelin basic protein and display an elaborated myelin membrane  
53 on stiffer substrates as compared to more compliant substrates indicating a preferred  
54 mechanical environment for differentiation [15].

55 *In vivo*, this mechanical environment is formed by the surrounding nervous tissue  
56 whose mechanical properties are determined by factors such as the combined  
57 material properties of neighboring cells, cell density, myelin content, collagen  
58 content, extra cellular matrix composition and cell interconnectivity [19, 20]. As these  
59 may change during development or after pathological events, concomitant changes  
60 of mechanical tissue properties and their direct involvement in a wide range of CNS  
61 conditions and diseases becomes apparent [21-24]. Axonal growth during optic tract  
62 development in *Xenopus laevis*, for instance, is guided by temporally changing  
63 stiffness gradients in adjacent brain tissue [18]. Acute demyelination in mouse  
64 models of multiple sclerosis is accompanied by an increase of stiffness in affected  
65 brain regions that were hypothesized to present a mechanically subideal environment  
66 to support potentially remyelinating oligodendrocytes [25].

67 The aforementioned examples of neural mechanosensitivity and stiffness changes of  
68 nervous tissues during developmental and pathological events suggest an intricate  
69 interplay between neural cell types and the mechanical properties of the nervous  
70 tissues in which they reside. Neurogenesis, axonogenesis and the resultant  
71 functional recovery after spinal cord injury in adult zebrafish might be likewise  
72 accompanied by, or even causally linked to the mechanical changes of the spinal  
73 parenchyma. Here, we have characterized the mechanical properties of the adult  
74 zebrafish spinal cord. AFM-enabled indentation measurements of acutely prepared  
75 living spinal cord slices revealed that spinal cord tissues display a homeostatic  
76 mechanical phenotype in which gray matter is stiffer than white matter along the  
77 anterior-posterior axis. The re-establishment of tissue homeostasis after complete  
78 spinal cord transection was accompanied by transient tissue stiffening. Hence, the

79 cell types and processes associated with functional recovery in adult zebrafish are  
80 exposed to spatio-temporally changing mechanical signals provided by the  
81 surrounding spinal parenchyma in adult zebrafish and could thus be influenced by  
82 these changing mechanical cues. Interestingly, the successful regrowth of axons  
83 across the lesion site was associated with an *increase* in the stiffness of the tissue,  
84 quite opposite of what might have been expected if a stiff glial scar constituted a  
85 mechanical barrier. This finding forms a solid, quantitative foundation for further  
86 studies into the causal relationship between mechanosensing and functional repair.

87

## 88 **Methods**

89 All animal experiments were conducted according to the guidelines of the German  
90 Animal Welfare Act and under the supervision of the Regierungspräsidium Dresden  
91 (DD24.1-5131/339/5 and D24-5131/338/52).

92

## 93 **Zebrafish lines**

94 All zebrafish were kept and bred under standard conditions as described in [26]. The  
95 transgenic line Tg(mbp:GFP) was established and provided by the laboratories of  
96 Cheol-Hee Kim, Chungnam National University, South Korea, and Hae-Chul Park,  
97 Korea University Ansan Hospital, South Korea [27]. The transgenic line Tg(alpha1-  
98 tubulin:mls-dsRed) was established in the laboratory of Carla Koehler, UCLA, USA  
99 and provided by Christopher Antos, CRTD, Germany. All experiments were carried  
100 out with Tg(mbp:GFP, alpha1-tubulin:mls-dsRed) fish and wild type fish (*wik*). All  
101 experiments comprise male and female fish.

102

## 103 **Spinal cord dissection for indentation measurements**

104 All zebrafish were sacrificed by immersion in ethyl 3-aminobenzoate  
105 methanesulfonate (MS-222, 0.1% in PBS, Sigma-Aldrich, A5040) until five minutes  
106 after the respiratory movement of the opercula stopped. This was followed by

107 subsequent immersion in ice-cold water as recommended in [28]. Sacrificed  
108 zebrafish were pinned to a silicone-covered petri dish and placed under a stereo  
109 microscope. First, dorsal scales were scrapped off. A scalpel was then used to  
110 transversely incise the muscle tissue near the brain stem and moved caudally with a  
111 sawing motion. To expose the vertebral column, forceps with different tip dimensions  
112 were used to remove remaining muscle tissue and carefully break away extending  
113 spinal processes. Once the spinal cord was fully exposed, thin forceps were used to  
114 gently detach the meninges. It has proven beneficial to keep the pia mater intact as  
115 its removal can introduce structural damage to the spinal cord and impede accurate  
116 vibratome sectioning. The desired length of tissue was separated from the remaining  
117 spinal cord by two incisions and levered out of the vertebral column using the tips of  
118 closed forceps. To wash away remaining blood and adipose cells, the severed spinal  
119 cord piece was placed in cold artificial cerebrospinal fluid (aCSF) that contained (in  
120 mM) 134 NaCl, 2.9 KCl, 1.2 MgCl<sub>2</sub>, 2.1 CaCl<sub>2</sub>, 10 HEPES buffer, and 10 glucose,  
121 adjusted to pH 7.8 with NaOH [29]. At last, laterally extending nerve fibers were  
122 abscised along the dissected spinal cord tissue as they can lead to the tissue being  
123 pulled out of the agarose embedding during vibratome sectioning. To indicate the  
124 tissue's directionality after dissection, various strategies were employed. For  
125 instance, the posterior part of the medulla oblongata, whose diameter is distinctly  
126 greater than that of the spinal cord, was exposed and excised along with the spinal  
127 cord tissue. Melanophores that cover the spinal cord's surface were left untouched  
128 and used for orientation. The caudally decreasing diameter of the spinal cord served  
129 as an additional indicator of directionality, but this evaluation required careful visual  
130 inspection and has proven suitable only for the dissection of great lengths of spinal  
131 cord tissue or entire spinal cords.

## 132 **Tissue embedding and vibratome sectioning for indentation measurements**

133 Dissected spinal cord tissue was immersed in liquid low-gelling-point agarose (2.5%  
134 in aCSF, cooled to 31°C, Sigma-Aldrich, A0701). The tissue was then centered and  
135 straightened with insect pins. Upon solidification, a piece of agarose gel containing  
136 the spinal cord tissue was cut out into a block of approximately 1.5 cm x 1.5 cm x 1.5  
137 cm that was transversely sectioned with an oscillating-blade vibratome. Most precise  
138 and even tissue sectioning was achieved by using a buffer temperature of 5 – 8°C, a  
139 cutting frequency of 100 Hz, a velocity of 2.5 mm/s and amplitude of 0.4 mm. A  
140 section thickness of 300 µm has proven to be optimal for subsequent sample  
141 mounting and indentation measurements. The acute spinal cord tissue sections were  
142 incubated in aCSF on ice until further processing for indentation measurements.

143

## 144 **Tissue sample mounting for indentation measurements**

145 Spinal cord sections selected for indentation measurements were immobilized on  
146 tissue culture plastic (TCP) with Histoacryl® (B. Braun, 9381104) which was sparsely  
147 applied between the TCP and the agarose embedding at a distance of about 3 mm  
148 from the spinal cord tissue. The tissue sections were submerged in cooled aCSF  
149 during indentation measurements.

150

## 151 **Spinal cord transection**

152 Zebrafish were anaesthetized by immersion in Ethyl 3-aminobenzoate  
153 methanesulfonate (0.02% in PBS, pH 7.5, Sigma-Aldrich, A5040) until respiratory  
154 movements of the opercula stopped (approximately 5 min). The surgical procedure  
155 was carried out as described in [12]. The vertebral columns were cut halfway  
156 between the dorsal fins and the opercula approximately at the level of the eighth  
157 vertebra. To account for changes of mechanical properties of the spinal cord tissue  
158 due to pre- and postoperative care, anesthesia and the incisional trauma, sham  
159 animals underwent the same procedure except for the spinal cord transection. Spinal

160 cord transected and sham-operated fish were sacrificed and subjected to the  
161 aforementioned preparation procedure at 2 weeks post-injury (wpi), 4 wpi and 6 wpi.  
162 All zebrafish used for spinal cord transections were six to nine months old.

163

#### 164 **Atomic force microscopy setup**

165 Indentation measurements enabled by atomic force microscopy (AFM) and  
166 simultaneous fluorescence microscopy was performed with the CellHesion200  
167 equipped with a motorized precision stage (JPK Instruments, Berlin) and the upright  
168 Axio Zoom.V16 stereo microscope with a PlanApo Z 0.5x objective (Carl Zeiss  
169 Microscopy, Jena). For indentation experiments, polystyrene beads ( $d = (37.3 \pm 0.3)$   
170  $\mu\text{m}$ , Microparticles GmbH, PS-F-37.0) were glued to tipless silicon cantilevers  
171 (Arrow-TL1, NanoWorld) with epoxyglue. Cantilevers were calibrated using the  
172 thermal noise method [30] prior to experiments; only cantilevers with spring  
173 constants between 0.015 N/m and 0.030 N/m were used.

174

#### 175 **Indentation measurements**

176 To obtain detailed spatial information about the mechanical properties of zebrafish  
177 spinal cord tissues, indentation measurements were carried out on transverse tissue  
178 sections obtained from distinct locations along the anterior-posterior axis of the fish.  
179 In case of uninjured specimens, tissue sections were located approximately at the  
180 level of the 4<sup>th</sup>, the 12<sup>th</sup>, the 20<sup>th</sup> and 28<sup>th</sup> vertebra. In case of spinal cord transected  
181 animals, tissue sections were located rostrally and caudally in proximity ( $< 500 \mu\text{m}$ )  
182 to the lesion site as well as distal ( $\approx 2.0 \text{ mm}$ ) to it. Tissue sections from sham-  
183 operated zebrafish were located at the same positions as described for spinal cord  
184 transected animals with the addition of tissue sections at the level of the lesion where  
185 the glial bridge in spinal transected fish is formed. Each tissue section was divided  
186 into nine regions of interest (ROIs) based on the fluorescence pattern of the  
187 transgenic fish line Tg(mbp:GFP, alpha1-tubulin:mls-dsRed), enabling the



188 discrimination of white and gray matter regions. In this line, GFP is expressed under  
189 the myelin basic protein promoter and dsRed is expressed under the alpha1-tubulin  
190 promoter and coupled to a mitochondrial leader sequence enabling the distinction  
191 between white (GFP-positive) and gray (dsRed-positive) matter regions, respectively.  
192 For each ROI, a grid of indentation points covering the entire ROI was set and force-  
193 distance curves were recorded using the AFM acquisition software (JPK  
194 Instruments). The indentation force was 4 nN and the indentation speed was 10  
195  $\mu\text{m/s}$ . The number of points per grid was chosen after estimating the approximate  
196 contact area of indenter and sample to avoid overlapping contact areas of  
197 neighboring indentation spots. For ROIs 2, 4 and 5, where a squared grid was often  
198 not suitable to probe the entire region, additional indentation curves were obtained  
199 manually. The order in which individual ROIs were probed was randomized for all  
200 tissue samples probed. To discern whether zebrafish spinal cord tissue elasticity was  
201 affected by the presence of fluorophores, all experiments were complemented by  
202 indentation measurements using wild type fish. High intensity transmitted light was  
203 sufficient to recognize areas that scattered light more strongly and therefore  
204 appeared darker (white matter) and areas that appeared lighter (gray matter). All  
205 indentation measurements took place at 18°C room temperature.

206

### 207 **Indentation data analysis**

208 Force-distance curves were analyzed using the JPK data processing software (JPK  
209 Instruments, Berlin, Germany) in which the indentation segments of the approach  
210 curves are fitted with the Hertz model for a spherical indenter:

211

$$F = \frac{E}{1 - \nu^2} * \left( \frac{a^2 + r^2}{2} \ln \frac{r + a}{r - a} - ar \right)$$

212

213 with

214 
$$\delta = \frac{a}{2} \ln \frac{r+a}{r-a},$$

215

216 where  $F$  denotes the indentation force,  $\delta$  the indentation depth,  $r$  the indenter radius  
217 and  $a$  the radius of the circular contact area between indenter and sample [31-33].  
218 The Poisson's ratio  $\nu$  was set to 0.5 for all analyses. The Young's modulus, or  
219 elasticity,  $E$  was used as the fitting parameter and served as a measure for the  
220 apparent elastic resistance of the probed sample to deformation. Since both  
221 measurement and analysis described in this study approximate the tissue as a purely  
222 elastic solid and do not account for viscous material properties, the values of the  
223 Young's modulus are termed 'apparent'. The elasticity maps were analyzed and  
224 assembled with a custom-written MATLAB algorithm (The MathWorks, Natick, MA)  
225 that used the Hertz model for a conical indenter:

226 
$$F = \frac{4}{3} * \frac{E}{1-\nu^2} * \sqrt{r} * \delta^3.$$

227

## 228 **Quantification of cell number density**

229 Transverse tissue sections were obtained from spinal cord transected and sham-  
230 operated zebrafish (Tg(mbp:GFP, alpha1-tubulin:mls-dsRed)) at 2 wpi, 4 wpi and 6  
231 wpi. The animals were sacrificed as described above followed by subsequent  
232 administration of PBS and 4% PFA through the *bulbus arteriosus* and incubation  
233 overnight in the same fixative. Spinal cord tissues were then dissected, post-fixed  
234 with fresh 4% PFA for 2 h and transferred to PBS. The fixed tissue samples were  
235 embedded in agarose, vibratome-sectioned and subjected to several washing and  
236 permeabilization steps using PBSTx (0.1% Triton X-100 in PBS) before nuclear  
237 staining with 4',6-diamidino-2-phenylindole (DAPI, 1:2000 in PBS). Tissue sections  
238 were then mounted and imaged by confocal fluorescence microscopy using the Zeiss  
239 LSM700, a 20x/0.8 objective to image entire cross-sections and a 63x/1.4 objective  
240 to resolve single nuclei in individual ROIs. Fluorescence signals acquired from

241 DsRed and GFP channels were used to identify individual gray and white matter  
242 regions as described for indentation measurements. Fluorescence signals from the  
243 DAPI channels were used to assess the number of nuclei, their volumes and cell  
244 number densities. For this purpose, acquired z-stacks of individual ROIs were  
245 converted to z-stacks of binary images by applying a Gaussian blur filter ( $\sigma = 2$ ),  
246 background subtraction and thresholding. A 3D objects counter [34] was then used to  
247 count nuclei detected within the imaged volume and quantify their volumes. Image  
248 processing was carried out with Fiji [35] using the same settings for all samples.  
249 Images obtained with the 63x objective were additionally subjected to a size filter to  
250 exclude background signals that could not be identified as nuclei. ROIs extracted  
251 from overview images obtained with the 20x objective yielded nuclei volumes that  
252 were summed and normalized to the volume of the imaged ROI resulting in relative  
253 nuclei densities. Volumes of single nuclei obtained with the 63x objective were used  
254 to determine an average nuclear volume for each ROI. Cell number density was then  
255 calculated by dividing the relative nuclei densities by the respective averaged  
256 volumes for single nuclei.

257

### 258 **Quantification of fluorescence intensity**

259 Images from spinal cord cross-sections obtained with the 20x/0.8 objective were  
260 divided into nine ROIs as described above. The z-axis profile tool in Fiji [35] was  
261 used to identify the optical slice of the z-stack of each ROI that exhibited the highest  
262 fluorescence intensity. This slice was extracted as a 2D gray scale image and used  
263 to calculate area, mean gray values and integrated density values. Integrated density  
264 values were corrected for background fluorescence intensities. The mean  
265 fluorescence intensity values of the background were determined by obtaining  
266 images of regions not belonging to the spinal cord tissue and subjecting them to the  
267 aforementioned procedure.

268

## 269 **Cell Body Area Quantification**

270 To quantify the area of individual cell bodies, confocal stacks from ROIs 1 and 4  
271 (gray matter) and ROIs 2 (white matter) that were imaged with the 63x/1.4 objective  
272 for the cell body density assessment were reanalyzed. ROI 1, 2 and 4 were chosen  
273 as representative regions. We used the DAPI signal to detect the presence of nuclei  
274 and, hence, a cell body. The area around each nucleus devoid of GFP was outlined  
275 with the selection tool in Fiji [35], quantified and used as an indicator for cell body  
276 area.

277

## 278 **Graphical representation of data and statistical analysis**

279 Each spinal cord section was divided into nine ROIs and each ROI was probed by  
280 indenting at least five different positions. For symmetry plots, the mean apparent  
281 Young's modulus of each ROI and each animal was calculated. For gray and white  
282 matter comparisons, the mean apparent Young's modulus for each animal was  
283 calculated from pooled gray matter ROIs (ROI 1, ROIs 3, ROIs 4) and pooled white  
284 matter ROIs (ROIs 2, ROIs 5), respectively. The sample size  $n$  refers to the number  
285 of animals, so that, for symmetry plots, each sample (each ROI) comprises at least  
286  $5*n$  indentations. In plots comparing combined gray and combined white matter,  
287 each sample (type of matter) contains at least  $25*n$  indentations for gray matter and  
288 at least  $20*n$  indentations for white matter. The graphical data representation was  
289 compiled with Python and utilizes violin plots in which dashed and full lines indicate  
290 interquartile ranges and medians, respectively. For each sample, the kernel density  
291 estimate was calculated using a bandwidth  $h$  with

$$h = 3.49 * \left(\frac{1}{n}\right)^{\frac{1}{3}} * \sigma$$

292 where  $n$  denotes the sample size and  $\sigma$  denotes the sample standard deviation [36].  
293 For multiple comparisons, statistical analysis was performed with the Kruskal-Wallis  
294 test followed by the Dunn-Šidák post-hoc method. For pairwise comparisons, the

295 Mann-Whitney test was used. Data obtained from confocal microscopy were  
 296 processed, plotted and subjected to statistical analyses in the same manner as  
 297 mechanical data. Asterisks indicate significance levels as follows: \* $p < 0.05$ ; \*\* $p$   
 298  $< 0.01$ ; \*\*\* $p < 0.001$ , \*\*\*\* $p < 0.0001$ .

299

## 300 Results

301

### 302 Indentation measurements on acute zebrafish spinal cord sections

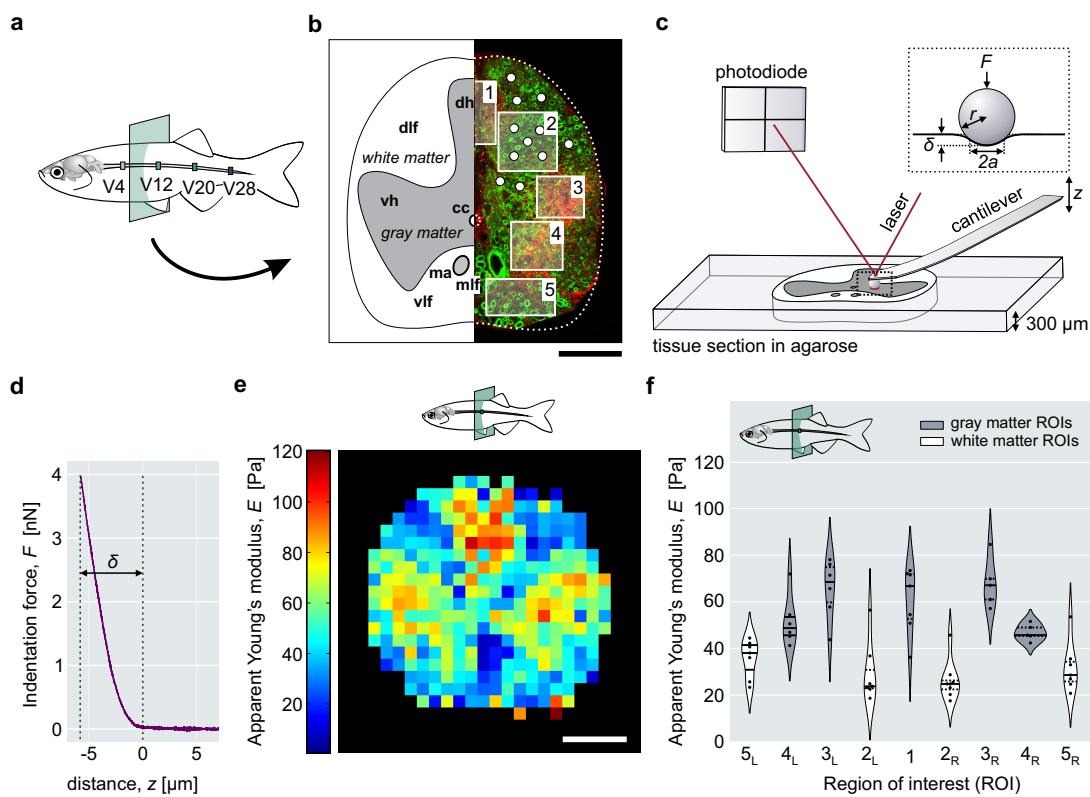

303

304 **Figure 1 AFM-based indentation measurements on acute zebrafish spinal cord**  
 305 **sections.** **a)** Schematic representation of the adult zebrafish spinal cord with four vertebral  
 306 levels from where investigated tissue sections were obtained. **b)** Schematic and fluorescence  
 307 image of a transverse spinal cord section depicting gray and white matter with distinct  
 308 anatomical structures and corresponding regions of interest. Exemplary indentation spots  
 309 (white) are shown for ROI 2. Myelin-rich regions are labeled with GFP (green, white matter).  
 310 Mitochondria-rich regions are labeled with dsRed (red, gray matter). (dh: dorsal horn, vh:  
 311 ventral horn, dlf: dorsal longitudinal fascicle, vlf: ventral longitudinal fascicle, mlf: medial  
 312 longitudinal fascicle, ma: Mauthner axons, cc: central canal). **c)** Schematic of an AFM-based  
 313 indentation setup. The insert shows the indentation force,  $F$ , and the geometrical factors used  
 314 by the Hertz model: indentation depth  $\delta$ , radius of the indenter  $r$  and radius of the contact  
 315 area  $a$ . **d)** Exemplary force-distance curve with indentation depth,  $\delta$ . **e)** Elasticity map  
 316 showing the spatial distribution of apparent Young's moduli of an entire spinal cord cross-  
 317 section obtained from the level of the 12<sup>th</sup> vertebra. **f)** Violin plot showing the apparent  
 318 Young's moduli of individual ROIs from one tissue section obtained from the level of the 12<sup>th</sup>  
 319 vertebra. Here, each data point represents the apparent Young's modulus from one

320 indentation spot. Enumeration of individual ROIs was carried out as shown in b). Indices L  
321 and R denote the left and right sides of the tissue section, respectively. Scale bars, 100  $\mu\text{m}$ .

322 To assess the mechanical properties of spinal cord tissues from adult zebrafish, we  
323 performed AFM-based indentation tests on acute, living (non-fixed), transverse spinal  
324 cord sections. These sections were obtained from vertebral levels that correspond to  
325 the 4<sup>th</sup>, the 12<sup>th</sup>, the 20<sup>th</sup> and the 28<sup>th</sup> vertebra (Fig.1a, Suppl.Fig.1). Each tissue  
326 section was divided into nine regions of interest (ROIs) based on the fluorescence  
327 pattern (Fig.1b) of the transgenic fish line Tg(mbp:GFP, alpha1-tubulin:mls-dsRed).  
328 The ROIs corresponded furthermore to distinct structural features of the spinal  
329 cytoarchitecture as described in [37]. ROI 1 comprises the dorsal horn (dh, Fig.1b),  
330 ROI 2 contains the dorsal longitudinal fasciculi (dlf, Fig.1b), ROI 3 and 4 comprise  
331 the ventral horns (vh, Fig.1b) and ROI 5 contains the ventral (vlf, Fig.1b) and medial  
332 longitudinal fasciculi (mlf, Fig.1b).

333 The tissue sections were probed (Fig.1c) using a spherical indenter. Each  
334 indentation yielded a force-distance curve (Fig.1d) that was fitted using the Hertz  
335 model (Fig.1c, insert) to derive the apparent Young's modulus  $E$  [31, 32] (see  
336 Methods). Elasticity maps (Fig.1e) of the entire spinal cord cross section were  
337 recorded to display the distribution of apparent Young's moduli in a color-coded  
338 manner. To compare stiffness values of different ROIs and compare their distribution,  
339 apparent Young's moduli were plotted as violin plots (Fig.1f). Both modes of data  
340 presentation suggest that gray matter regions are stiffer than white matter regions in  
341 the displayed sample section, which we set out to further investigate.

342 As the mechanical characterization of zebrafish spinal cord tissue reported here  
343 aimed at describing intrinsic mechanical tissue properties that occur in living tissues,  
344 viability and structural integrity of the tissue sections were investigated with necrosis  
345 and apoptosis assessments (see Suppl. Methods and Suppl. Information). The  
346 results obtained from both viability assays showed that the sample preparation and  
347 course of the experiment did not impair the overall tissue viability or tissue  
348 architecture in the time interval of 5 hours *post-mortem* used for mechanical testing  
349 (Suppl.Fig.1).

350 **Gray matter regions are stiffer than white matter regions**

351 To systematically characterize the mechanical phenotype of spinal cords in adult  
352 zebrafish, we performed indentation measurements on individual tissue sections of  
353 ten zebrafish (Fig. 2a) that were obtained from different vertebral levels (Fig. 2b) and  
354 repeated those experiments for zebrafish of different ages (Fig. 2c). Regions  
355 corresponding to gray matter (ROIs 1, 3, 4) were stiffer than regions corresponding  
356 to white matter (ROIs 2, 5) (Fig. 2a). Within the gray matter, the dorsal horns (ROIs  
357 1) and the most dorsal parts of the ventral horns (ROIs 3) displayed greater median  
358 elasticities in comparison to ROIs 4. White matter regions ROIs 2 showed smaller  
359 median elasticities than white matter regions ROIs 5. The apparent Young's moduli  
360 of all individual ROIs were distributed symmetrically with respect to the dorso-ventral  
361 midline. This bilateral symmetry reflected the tissue's architectural symmetry as  
362 indicated by the observed fluorescence pattern (Fig. 1b). The mechanical symmetry  
363 was maintained in all investigated tissue sections obtained from uninjured animals  
364 along the anterior-posterior axis of the spinal cord (Suppl. Fig. 3,4) regardless of age  
365 or presence of fluorophores (Suppl. Fig. 3,4,5).

366

367 **The difference between gray and white matter is maintained along the A-P axis**

368 To assess the distribution of elasticity values at different vertebral levels, we  
369 combined ROIs 1, 3 and 4 to gray matter and ROIs 2 and 5 to white matter and  
370 plotted their respective elasticity values as a function of location along the anterior-  
371 posterior axis of the spinal cord (Fig. 2b). Spinal gray and white matter within the 4<sup>th</sup>,  
372 the 12<sup>th</sup>, the 20<sup>th</sup> vertebra displayed comparable elasticity values respectively,  
373 whereas both gray and white matter showed elevated values near the 28<sup>th</sup> vertebra  
374 (Fig. 2b,c, Suppl. Fig. 3,4).



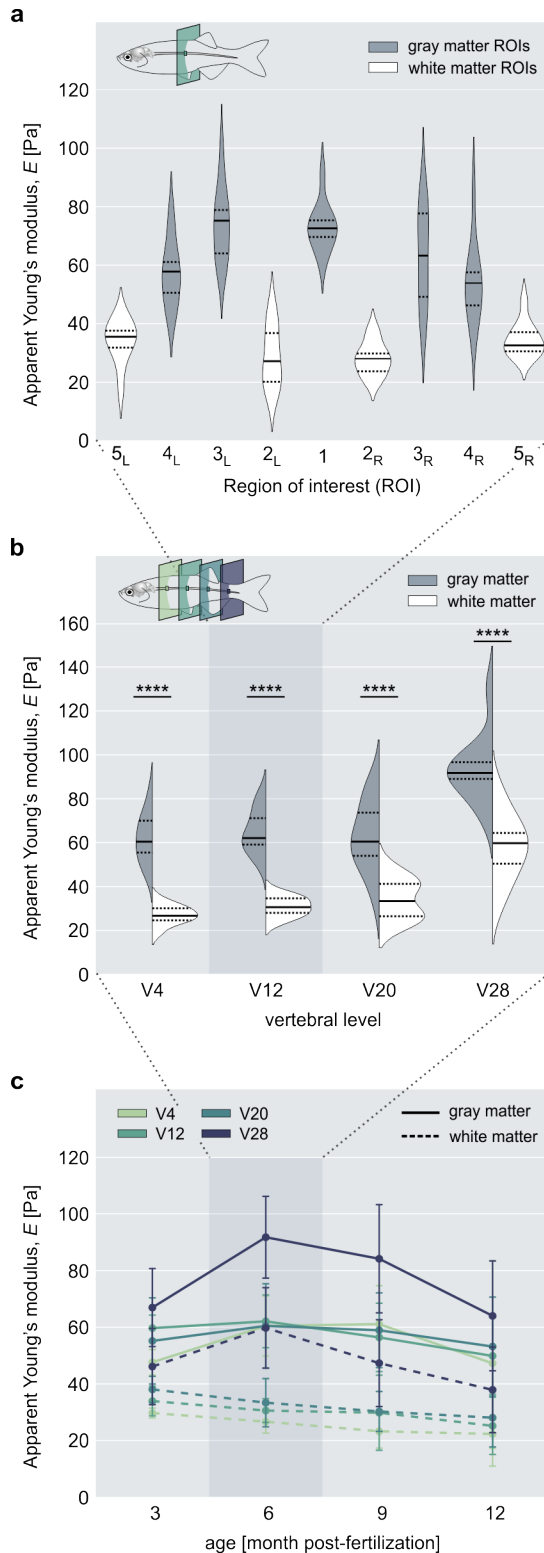

375

376 **Figure 2 Spinal cord elasticity of adult zebrafish.** a) The apparent Young's moduli of  
 377 individual ROIs from spinal cord sections of ten animals ( $n = 10$ ) located at the level of the  
 378 12<sup>th</sup> vertebra. b) Distribution of apparent Young's moduli of combined gray and white matter  
 379 ROIs along the anterior-posterior axis at the indicated vertebral levels. All specimens ( $n = 10$ )  
 380 were 6 months old. Solid lines and dashed lines represent medians and interquartile ranges,  
 381 respectively. \*\*\*\* $p < 0.0001$ . c) Comparison of the apparent Young's moduli of spinal gray  
 382 and white matter at different vertebral levels (V4 - V28) and at 3 months post-fertilization  
 383 (mpf) ( $n = 5$ ), 6 mpf ( $n = 10$ ), 9 mpf ( $n = 10$ ) and 12 mpf ( $n = 10$ ).  
 384

385 The difference of apparent Young's moduli between gray and white matter remained  
386 constant along the anterior-posterior axis (Fig. 2b) and was furthermore maintained  
387 throughout their life span (Fig. 2c), although absolute elasticity values of both gray  
388 and white matter decreased with age (Fig. 2c).

389 To test whether the presence of transgenic fluorophores might have an influence on  
390 this pattern, we also measured wild type fish. In those specimens, the absolute  
391 apparent Young's moduli of gray matter, but not white matter were lower as  
392 compared to transgenic fish (Suppl. Fig. 5a-d). Wild type spinal tissue also showed a  
393 less pronounced increase of elasticity and difference between white and gray matter  
394 in tissue sections located at the 28<sup>th</sup> vertebra (Suppl. Fig. 5e) and the difference  
395 between spinal gray matter and spinal white matter was also maintained throughout  
396 their life span (Suppl. Fig. 5f).

397

### 398 **Adult zebrafish spinal cord regeneration is accompanied by transient tissue** 399 **stiffening**

400 To capture a spatially and temporally resolved mechanical phenotype in response to  
401 spinal cord injury, indentation measurements were executed with tissue sections  
402 from different spinal levels (see Methods and Suppl. Fig. 1) at 2 weeks post-injury  
403 (wpi), 4 wpi and 6 wpi. In spinal transected fish, the vertebral column was severed  
404 halfway between the dorsal fins and the opercula, which corresponds to the location  
405 of the 8<sup>th</sup> vertebra [12]. The apparent Young's moduli of gray and white matter from  
406 uninjured zebrafish displayed constant elasticity values around this spinal level and  
407 were used as a reference for both spinal cord transected and sham-operated fish  
408 (Suppl. Fig. 2,3). After complete spinal cord transection, caudal spinal cord sections  
409 proximal to the lesion site displayed a significant increase of white matter stiffness at  
410 2 wpi which rendered the formerly pronounced mechanical difference between gray  
411 and white matter non-significant (Suppl. Fig. 6f). By 4 wpi, the apparent Young's  
412 moduli of both gray and white matter had increased further in comparison to values

413 measured at 2 wpi and to values from uninjured control animals (Suppl. Fig. 6f).  
414 White and gray matter reached comparable elasticity levels (Fig. 3a, Suppl. Fig. 7e).  
415 At 6 wpi, the elasticity of both gray and white matter declined as compared to 4 wpi,  
416 but remained elevated with respect to uninjured control animals (Suppl. Fig. 6f). The  
417 difference between gray and white matter elasticity was re-established (Suppl. Fig.  
418 6f, 7f). Rostral tissue sections that were located proximal to the lesion site displayed  
419 a similar stiffness evolution in the same time interval post-injury, albeit the changes  
420 of apparent Young's moduli were less pronounced (Suppl. Fig. 6c). At 2 wpi, the  
421 apparent Young's modulus of white matter increased and the mechanical difference  
422 between gray and white matter became less significant (Suppl. Fig. 6c, Suppl. Fig.  
423 7a). At 4 wpi, the apparent Young's moduli of gray and whiter matter increased, but  
424 gray matter remained stiffer than white matter (Fig. 3b, Suppl. Fig. 6c, Suppl. Fig.  
425 7b). At 6 wpi, the gray and white matter elasticity decreased towards the level of  
426 uninjured animals and their characteristic difference as observed in homeostatic  
427 tissues was re-established. White matter elasticity values remained elevated in  
428 comparison to uninjured control fish (Suppl. Fig. 6c, Suppl. Fig. 7c). Spinal cord  
429 tissue sections that were located rostrally and distal to the lesion site displayed no  
430 change of mechanical properties in comparison to uninjured control animals (Suppl.  
431 Fig. 6a). Caudally, however, distal tissue sections showed an increase of white  
432 matter, but not gray matter elasticity that remained constant during the investigated  
433 time interval (Suppl. Fig. 6h). Spinal cord tissues of sham-operated zebrafish did not  
434 differ mechanically from uninjured counterpart at all investigated time points (Suppl.  
435 Fig. 6b,d,e,g,l, Suppl. Fig. 8). While absolute values, spread of data and significance  
436 levels differed in some tissue sections in wild type fish, spinal cord transections  
437 (Suppl. Fig. 9a,c,f,h, Suppl. Fig. 10) and sham treatments (Suppl. Fig. 9b,d,e,g,l,  
438 Suppl. Fig. 11) elicited a spatio-temporal profile of tissue elasticity that was  
439 comparable to their respective transgenic counterparts for all investigated locations  
440 and time points.

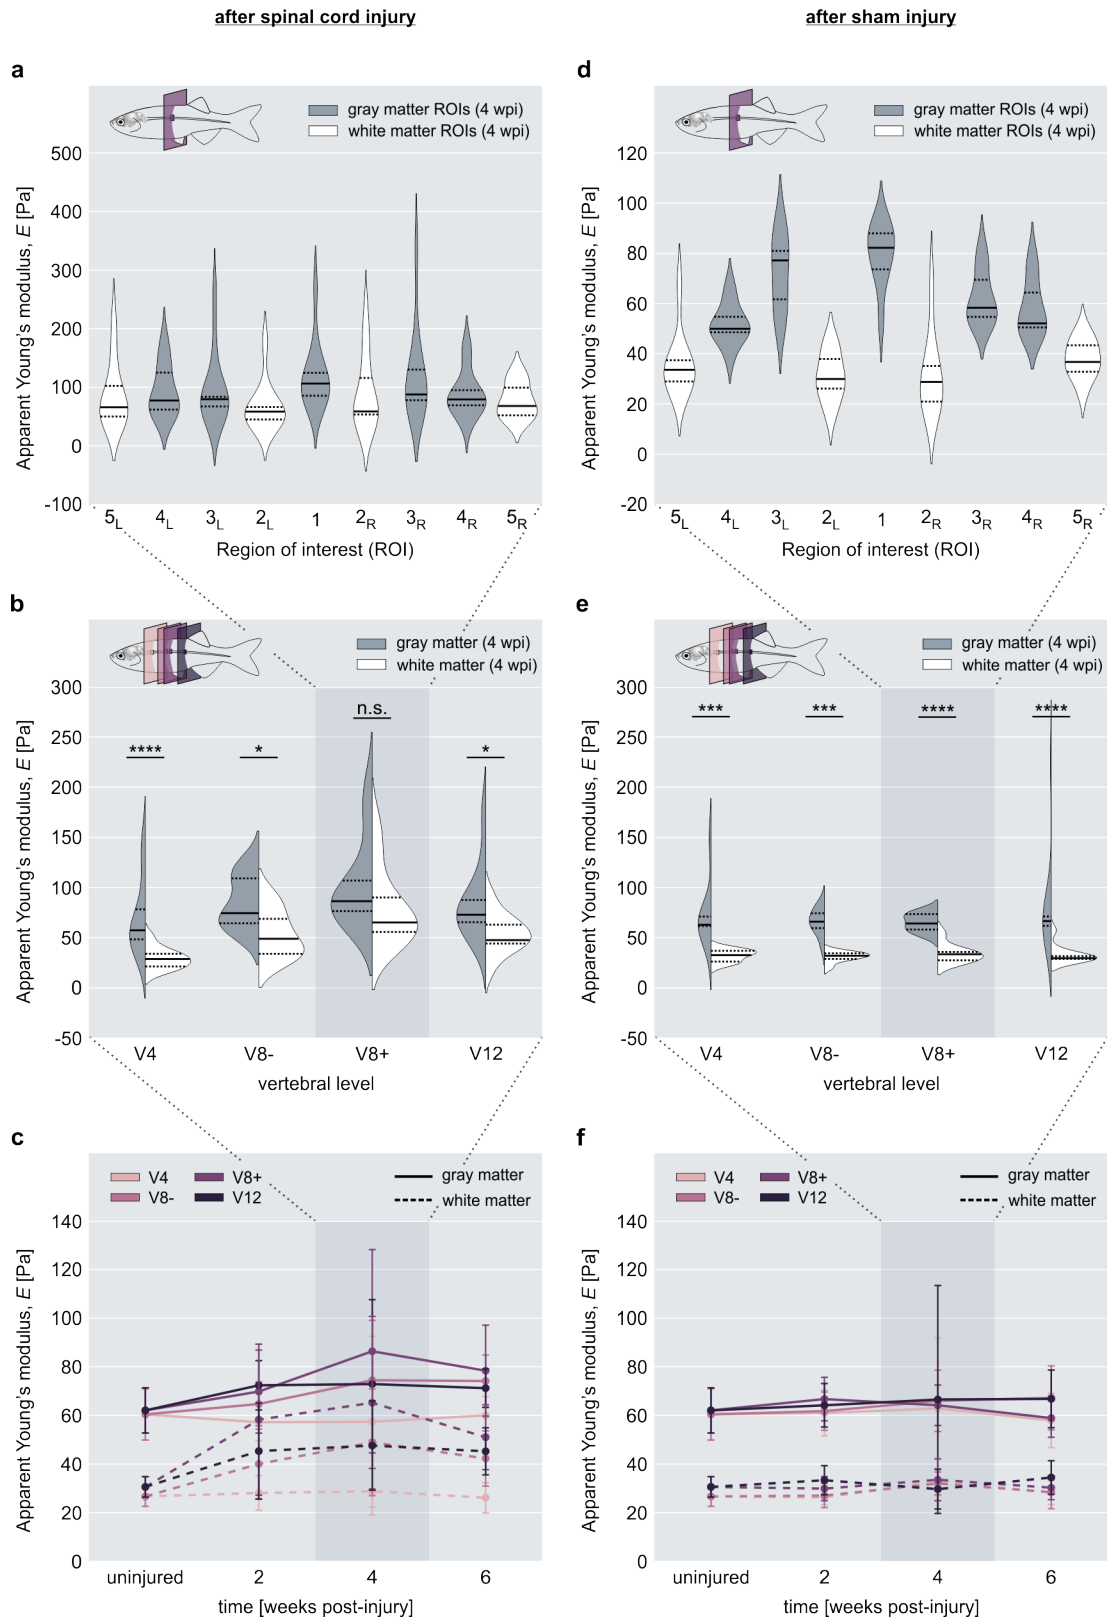

441

442 **Figure 3 Spinal cord elasticity of adult zebrafish during regeneration.** a) The apparent  
 443 Young's moduli of individual ROIs from spinal cord sections ( $n = 10$ ) located caudally near the  
 444 lesion site (V8+) at 4 weeks post-injury (wpi). b) Distribution of apparent Young's moduli of  
 445 combined gray and white matter at 4 wpi ( $n = 10$ ). Tissue sections were located rostrally and  
 446 caudally proximal (V8-, V8+) and distal (V4, V12) to the lesion site. c) Comparison of the  
 447 apparent Young's moduli of spinal gray and white matter from the vertebral levels indicated in  
 448 b) at 2 wpi ( $n = 10$ ), 4 wpi ( $n = 10$ ) and 6 wpi ( $n = 10$ ). d) The apparent Young's moduli of

449 individual ROIs from spinal cord sections ( $n = 10$ ) of sham injured zebrafish at 4 wpi. The  
450 location of tissue section corresponded to the V8+ level in spinal transected animals. **e**)  
451 Distribution of apparent Young's moduli of combined gray and white matter at 4 wpi ( $n = 9$ ).  
452 Tissue sections were located at the same vertebral levels as tissue sections from spinal  
453 transected fish (V4, V8-, V8+, V12). **f**) Comparison of the apparent Young's moduli of spinal  
454 gray and white matter from the vertebral levels indicated in e) at 2 wpi ( $n = 10$ ), 4 wpi ( $n = 9$ )  
455 and 6 wpi ( $n = 10$ ). Solid lines and dashed lines in a), b), d) and e) represent medians and  
456 interquartile ranges, respectively. \* $p < 0.05$ , \*\*\* $p < 0.001$ , \*\*\*\* $p < 0.0001$ .  
457

## 458 **Cell body density inconsistently contributes to spinal cord elasticity**

459 To explain the mechanical difference between gray and white matter areas in murine  
460 spinal cord tissues, Koser et al. have proposed to correlate the distribution and sizes  
461 of cell nuclei, as a proxy for cell number density, with the calculated apparent  
462 Young's moduli of the respective tissue regions [38]. To be able to investigate the  
463 role of cell number density as a potential determinant of spinal cord tissue elasticity  
464 in adult zebrafish, we obtained confocal stacks of DAPI-stained tissue sections (Fig.  
465 4a) and quantified the distribution and densities of cell bodies in uninjured spinal cord  
466 tissue and after complete transection. The use of the same transgenic fish line  
467 characterized by mechanical testing allowed the correlation between mechanical  
468 properties and cell body density in individual ROIs.

469 In uninjured tissues, gray and white matter elasticity correlated with cell number  
470 density only when all individual gray matter and white matter regions were combined  
471 (Fig. 4b,c). The positive correlation between cell number density and the apparent  
472 Young's moduli originated from the high density of cells in the dorsal horn (ROI 1,  
473 Fig. 4a,b). The ventral horns (ROIs 3 and 4, Fig. 4a,b) displayed an amount of cell  
474 bodies comparable to white matter regions (ROIs 2 and 5), but differed significantly  
475 in elasticity (Fig. 4d). After spinal cord injury, we observed an increase of both  
476 apparent Young's moduli and cell body density (Fig. 4e,f). However, the exact  
477 temporal profile of cell body density did not mirror the evolution of mechanical  
478 properties in the course of regeneration. For instance, the increase in elasticity after  
479 spinal cord injury peaks at 4 wpi (Fig. 4f) for both gray and white matter, but the  
480 respective cell body densities showed a significant increase at 2 wpi that remained

481 until 4 wpi. During regeneration, the cell body density of white matter was lowest at 4  
 482 wpi – a time point when elasticity values were highest.

483

484

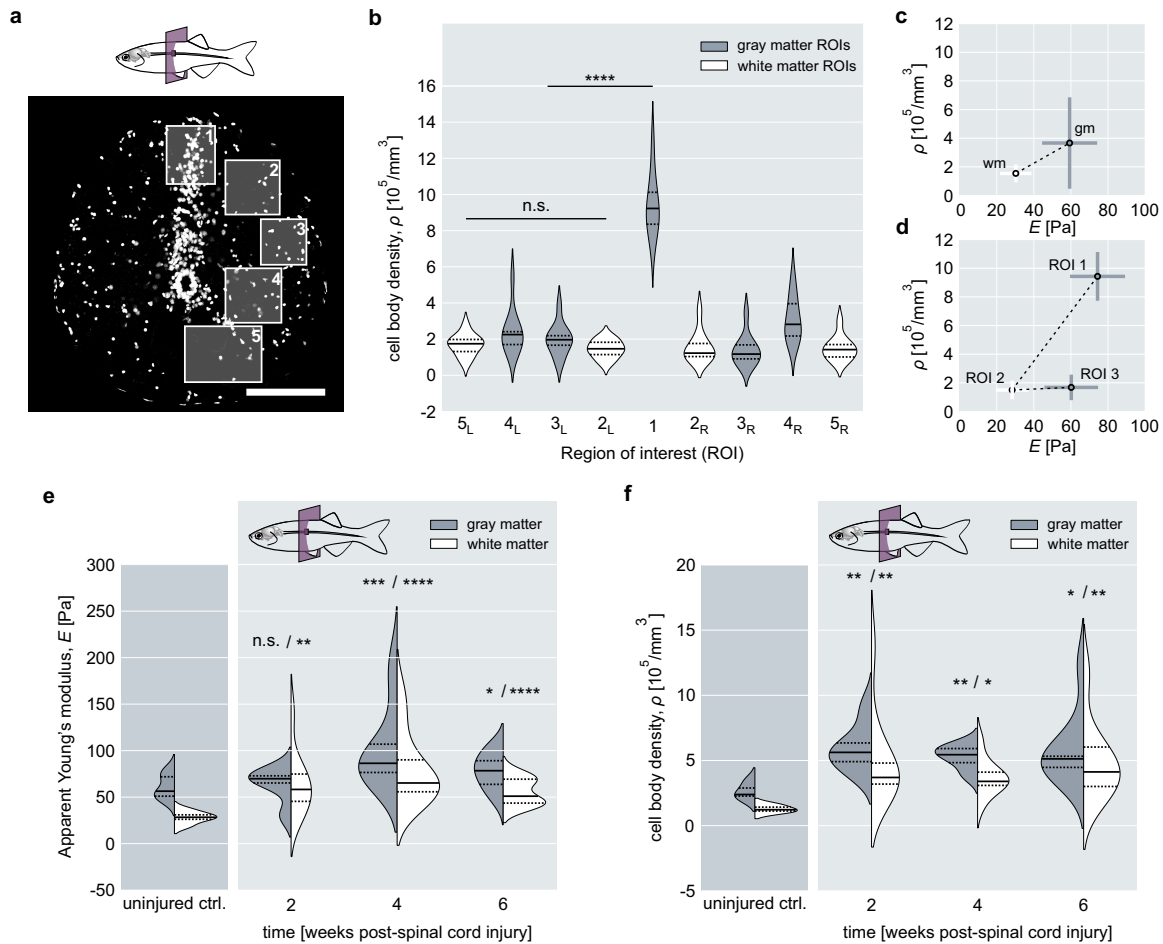

485

486 **Figure 4 Quantification of cell body density.** **a)** Fluorescence image showing the  
 487 distribution of DAPI-stained nuclei (white) in a transverse zebrafish spinal cord section  
 488 obtained from a level corresponding to the 8<sup>th</sup>-9<sup>th</sup> vertebra. Scale bar, 100  $\mu$ m. **b)** Distribution  
 489 of cell body density in individual ROIs ( $n = 10$ ) as indicated in **a**). Solid lines and dashed lines  
 490 represent medians and interquartile ranges, respectively. **c)** Correlation of median apparent  
 491 Young's moduli from combined gray (gm) and combined white matter (wm) with respective  
 492 cell body densities. **d)** Correlation between apparent Young's moduli and cell body densities  
 493 of ROI 1, 2 and 3. **e)** Apparent Young's moduli of spinal gray matter and spinal white matter  
 494 at the level of the 8<sup>th</sup>-9<sup>th</sup> vertebra during regeneration at 2 wpi ( $n = 10$ ), 4 wpi ( $n = 10$ ) and 6  
 495 wpi ( $n = 10$ ). Solid lines and dashed lines represent medians and interquartile ranges,  
 496 respectively. Significance levels correspond to pairwise comparisons with gray and white  
 497 matter from uninjured control animals ( $n = 10$ ), respectively. **f)** Cell number density of spinal  
 498 gray and white matter during regeneration at 2 wpi ( $n = 10$ ), 4 wpi ( $n = 10$ ) and 6 wpi ( $n = 9$ ).  
 499 Solid lines and dashed lines represent medians and interquartile ranges, respectively.  
 500 Significance levels correspond to pairwise comparisons with gray and white matter from  
 501 uninjured control animals ( $n = 3$ ), respectively. \* $p < 0.05$ , \*\* $p < 0.01$ , \*\*\* $p < 0.001$ , \*\*\*\* $p <$   
 502  $0.0001$ .

503

504 **Tissue architecture correlates with mechanical differences**

505 Confocal fluorescence microscopy using the Tg(mbp:GFP, alpha1-tubulin:mls-  
506 dsRed) fish line revealed further structural elements that might contribute to zebrafish  
507 spinal cord elasticity. In this fish line, oligodendrocytes express GFP under the  
508 myelin basic protein promoter [27], which allows the visualization of oligodendrocytes  
509 and axonal orientation in each ROI. As oligodendrocytes myelinate multiple axons,  
510 they might serve as a crosslinking factor in the spinal parenchyma. Axonal  
511 orientation has been shown to influence the tissue's resistance to indentation as  
512 axonal projections in the white matter are aligned in parallel to the indentation  
513 direction in transverse tissue sections [38]. As exemplarily indicated for ROIs 1, 4  
514 and 2, gray and white matter regions displayed different mechanical properties that  
515 could not be explained by their respective cell number densities alone. ROI 1 showed  
516 the highest amount of cell bodies (Fig. 4c, Fig. 5a) and the least amount of  
517 oligodendrocytes (Fig. 5a,d). ROI 4 displayed a median apparent Young's modulus  
518 twice as high as that of ROI 2, although both regions had a similar number of cell  
519 bodies (Fig. 4c). They differed, however, with regard to axonal orientation and cell  
520 body size (Fig. 5b,e). Furthermore, we observed blood vessels predominantly in gray  
521 matter regions, but not white matter regions (Fig. 5f).

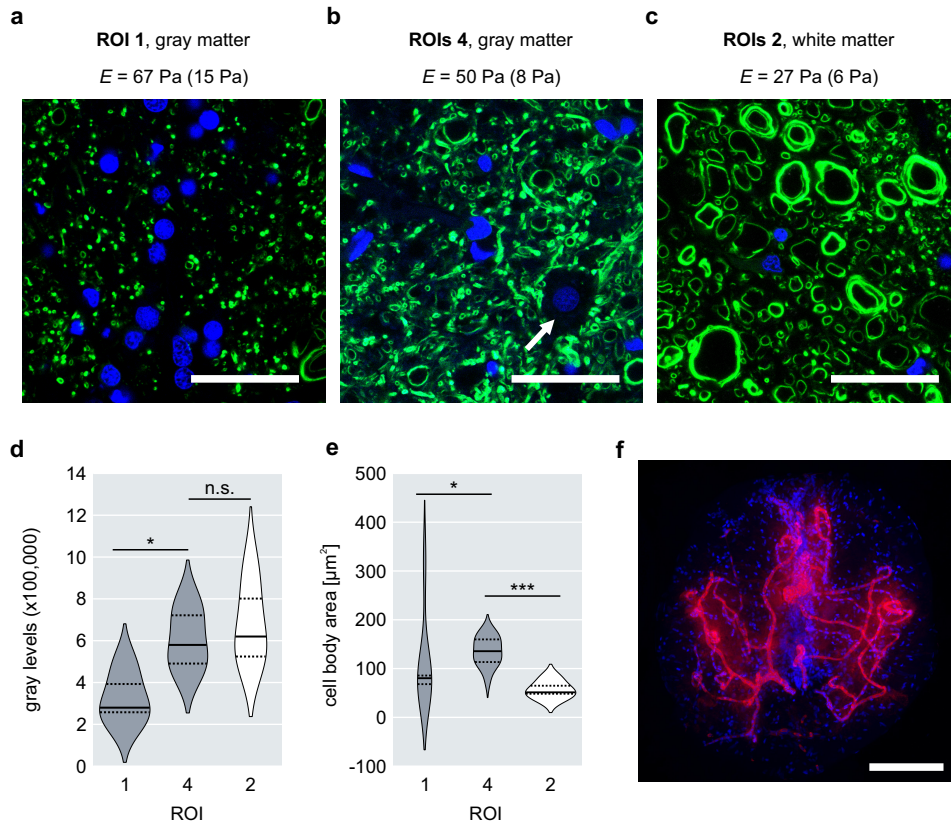

522

523 **Figure 5 Additional contributing factors to adult zebrafish spinal cord elasticity.**  
524 Exemplary fluorescence images of two gray matter regions, ROI 1 (a) and ROI 4 (b), and one  
525 white matter region, ROI 2 (c), showing oligodendrocytes (GFP, green) and cell nuclei (DAPI,  
526 blue). Scale bar, 50  $\mu\text{m}$ . The apparent Young's moduli for the respective ROIs are given as  
527 median (inter quartile range). **d**) Fluorescence intensity quantification of the GFP signal from  
528 ROIs 1,4 and 2 ( $n = 5$ ). **e**) Quantification of the cell body areas in ROIs 1,4 and 2 ( $n = 7$ ). The  
529 position and size of individual cell body areas were determined by using the DAPI signal to  
530 detect the presence of a cell body and outlining the area around each nucleus devoid of GFP  
531 (arrow in b). \* $p < 0.05$ , \*\*\* $p < 0.001$ . **f**) Fluorescence image of a transverse spinal cord  
532 section showing the vasculature (autofluorescence, red) in the spinal gray matter of adult  
533 zebrafish. Cell nuclei are depicted in blue. Scale bar, 100  $\mu\text{m}$ .



## 534 **Discussion**

535 The present study focused on the mechanical characterization of the adult zebrafish  
536 spinal cord in order to investigate the evolution of the mechanical tissue properties  
537 following spinal cord transection. An efficient and reliable protocol was established  
538 that allowed obtaining and preserving acute zebrafish spinal cord sections for  
539 consecutive mechanical measurements without fixation. Since the sectioned spinal  
540 cord tissues remained viable and structurally intact during the time interval of  
541 mechanical testing, we consider our results to be physiologically relevant. AFM  
542 based indentation measurements were then employed to determine the apparent  
543 Young's moduli of spinal cord tissues from uninjured zebrafish and at distinct time  
544 points during regeneration. We showed that the apparent Young's moduli of gray  
545 matter regions were greater than those of white matter regions in spinal cords of  
546 uninjured, adult zebrafish (Fig. 6a). Previous studies measuring the stiffness of  
547 nervous tissues from mouse and rat also found that gray matter was stiffer than white  
548 matter [24, 38, 39]. However, the absolute values of zebrafish spinal cord tissue  
549 stiffness were almost an order of magnitude lower as compared to their rodent  
550 counterparts [24, 38]. The distribution of individual regions of interest furthermore  
551 mirrored the symmetry of the spinal cytoarchitecture of adult zebrafish as described  
552 in [37]. Each tissue region contains a specific set of cell bodies, processes and  
553 filaments that vary in structural arrangement and/or density and consequently  
554 amount to distinct tissue architectures. Gray matter regions consist of densely  
555 packed processes, synapses, neurofilaments and neuronal cell bodies, whereas  
556 white matter regions contain ascending and descending myelinated axon tracts that  
557 run in parallel to the anterior-posterior axis of the spinal cord and are crosslinked by  
558 oligodendrocytes [37]. The dorsal horn exhibited the highest elasticity values in  
559 uninjured specimen and displayed a tissue architecture that was dominated by the  
560 presence of densely packed cell bodies. In addition, blood vessels are present  
561 predominantly in gray matter regions of the zebrafish spinal cord where they might

562 add structural support and contribute to the greater tissue elasticity values measured.

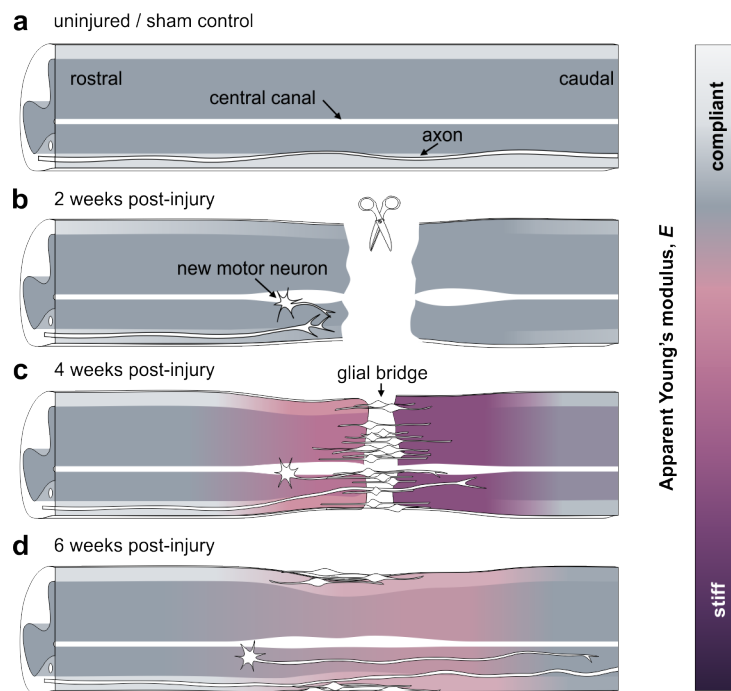

563

564 **Figure 6 Graphical summary of the spatio-temporally changing mechanical phenotype**  
565 **of adult zebrafish during spinal cord regeneration.** a) Schematic representation of an  
566 uninjured or sham operated spinal cord tissue in which gray matter was stiffer than white  
567 matter along the anterior-posterior axis. b) At 2 wpi, white matter regions in proximity to  
568 the lesion site had increased in stiffness. Gray matter remained mechanically at uninjured levels.  
569 c) At 4 wpi, both white and gray matter stiffened significantly and, in caudal tissue sections,  
570 became mechanically comparable. This effect was more pronounced in proximity to the lesion  
571 site than in distal tissue sections. c) At 6 wpi, the elasticities of gray and white matter had  
572 decreased in comparison to 4 wpi, but remained elevated in comparison to uninjured control  
573 animals. The mechanical difference between gray and white matter was re-established.

574

575 The region located circumferentially around the central canal was subjected to  
576 indentation measurements as well, but the vast majority of force-indentation curves  
577 recorded in this region could not be analyzed due to missing baselines (approach  
578 segments) or multiple slopes of indentation segments. This effect could be explained  
579 by uneven sectioning results that were likely caused by the mechanical instability of  
580 columnar epithelium lining the central canal. This particular region was therefore  
581 excluded from data presentation and discussion.

582 Median elasticities of gray and white matter regions were furthermore comparable in  
583 most vertebral levels possibly reflecting the likewise comparable tissue architecture  
584 in the spinal cord along the length of the animal. The increased apparent Young's

585 moduli of tissue sections located at the 28<sup>th</sup> vertebra might arise from a more densely  
586 packed spinal cord tissue due to the caudally decreasing diameter of the spinal cord  
587 and/or altered structural properties of individual tissue components. For instance,  
588 sensory fibers and processes of radial glia, both of which display progressively  
589 increasing densities toward the caudal part of the spinal cord [37], might serve to  
590 explain the increase of tissue elasticity in ROIs 5. Apart from that, it is currently not  
591 known if and how the spinal composition changes in the most caudal spinal cord  
592 parts.

593 After complete spinal cord transection, adult zebrafish displayed an increase of  
594 spinal gray matter and spinal white matter elasticity that transiently obliterated both  
595 the distinct mechanical difference between the two types of matter and, in caudal  
596 sections, the mechanical symmetry with respect to the dorso-ventral midline. This  
597 effect was more pronounced in the vicinity of the lesion site and less marked in tissue  
598 sections located distal to the lesion site (Fig. 6b-d). As all sham treatments, i.e. pre-  
599 and postoperative care, anesthesia and the incisional trauma, could be excluded as  
600 potential elicitors, the change of mechanical properties in the course of regeneration  
601 can be attributed to the spinal cord transection. This suggests a correlation between  
602 the cellular events induced by the lesion and the spatio-temporal profile of tissue  
603 elasticity in the course of regeneration. In light of recent studies on neural  
604 mechanosensitivity and stiffness changes of nervous tissue during developmental  
605 and pathological events, it is an open question if and how mechanical cues are  
606 provided by the spinal cord tissue after spinal cord injury. It has been speculated that  
607 the glial-fibrotic scar in mammals — which is densely packed with cells and ECM —  
608 is significantly stiffer than its environment and may act as a mechanical and  
609 structural barrier obstructing the penetration of axons and thereby axonal regrowth  
610 across the lesion site [2, 40]. In contrast, adult zebrafish show robust functional  
611 regeneration and tissue repair after spinal cord injury [6], and the apparent Young's  
612 moduli of both gray and white matter regions reached their highest level at a time

613 point when regrowing axons traverse the injury site. Koser et al. have shown that  
614 growing axons of retinal ganglion cells possess mechanosensitive ion channels that  
615 allow them to detect differences in tissue stiffness in the developing frog brain and,  
616 as a result, extend faster, straighter and in a fasciculated way [18]. A similar  
617 mechanism might be at play in the regenerating zebrafish spinal cord in which the  
618 exposure of regrowing axons to greater tissue stiffness may promote axonal  
619 pathfinding by enhanced fasciculation and growth velocity. In any case, the fact that  
620 spinal cord regeneration in zebrafish was accompanied by an increase in tissue  
621 elasticity motivates to question the assumption that axonal regrowth after spinal cord  
622 injury in mammals is impeded by the presumably stiffer environment of the glial-  
623 fibrotic scar [2]. In fact, Moeendarbary et al. have recently shown that neural tissue in  
624 rat brain cortex and spinal cord softens after traumatic injury, which correlates with  
625 an increase of expression levels of glial intermediate filaments and ECM components  
626 [2, 24]. Their finding and ours combined supports the hypothesis that an increase  
627 rather than a decrease in spinal cord elasticity after injury might facilitate neuronal  
628 regrowth and spinal cord regeneration.

629 An additional indicator for mechanically guided axonal pathfinding in regenerating  
630 zebrafish might be presented by axonal rerouting. As described in [41], regrowing  
631 axons that descend from the brainstem encounter remaining myelin debris and  
632 reroute from the white matter to the central gray matter caudal to the lesion site. The  
633 observed rerouting lets the authors suggest that degenerating tracts are not a  
634 preferred substrate for axonal regrowth, although it has been shown that myelin-  
635 associated inhibitors of regeneration in mammals are growth-permissive in zebrafish  
636 [42, 43]. In light of the presented mechanical characterization, it seems possible that  
637 the observed rerouting is a consequence of altered mechanical tissue properties and  
638 axonal mechanosensing.

639 While the mechanical properties of uninjured, spinal transected and sham operated  
640 zebrafish were qualitatively comparable between transgenic and wild type fish for the

641 majority of investigated locations and time points, absolute values, spread of data  
642 and significance levels differed in some tissue sections. This might be in part  
643 attributable to the lower number of investigated wild type specimens and the  
644 concomitant impact of intraspecies variation on the small-sized population. However,  
645 it cannot be ruled out that the presence of fluorophores influences the mechanical  
646 properties of the spinal cord tissue and therefore leads to differing absolute values of  
647 apparent Young's moduli.

648 The mechanical properties of biological tissues are thought to be determined by the  
649 material properties of the constituent cells, ECM and the degree of intercellular  
650 adhesion and connectivity [19]. Koser et al. have proposed to consider additional  
651 criteria to predict nervous tissue stiffness based on fluorescently labeled tissue  
652 components such as cell body density, myelin content, collagen content, extra  
653 cellular matrix composition and axonal orientation [20, 38]. Our results show that cell  
654 body density is not sufficient to explain the mechanical differences between gray and  
655 white matter in zebrafish spinal cords nor the spatio-temporal evolution of the  
656 apparent Young's modulus during spinal cord regeneration. Based on our  
657 microscopy analyses and previously published reports [8, 37, 41, 44], we submit that  
658 spinal cord tissue elasticity in zebrafish results from a complex synergistic effect in  
659 which cell body density and concomitant packing density, single cell stiffness, degree  
660 of crosslinking, vasculature and the presence and composition of ECM and/or yet  
661 undetermined factors contribute differently at distinct time points post-injury.  
662 Additional information about the structural determinants of zebrafish spinal tissue  
663 elasticity might be obtained from indentation measurements using tissues that were  
664 sectioned along sagittal or coronal planes. As described in [38], murine spinal white  
665 matter regions behave transversely isotropic which has been attributed to the  
666 different orientation of axon bundles as they are aligned perpendicular to the  
667 indentation direction in coronal and sagittal sections, but parallel to it in transverse  
668 sections. Indentations executed on transversely sectioned white matter regions might

669 elicit a buckling response instead of or in addition to compression and would  
670 therefore yield underestimated elasticity values. This might contribute to the lower  
671 apparent Young's moduli of white matter regions in both mice and zebrafish spinal  
672 cords. However, the zebrafish spinal cord is significantly smaller in diameter than its  
673 murine counterpart, which aggravates precise vibratome-sectioning along coronal or  
674 sagittal planes. Lipid-rich membranes might also cause the comparatively low  
675 elasticity values of white matter regions. These surround myelinated axons and close  
676 in dome-like structures upon sectioning. Such structures might yield a slippage of the  
677 indenter and prevent proper indentation if the indentation force and indentation depth  
678 are too small (Suppl. Fig. 12). Therefore, future experiments may involve non-  
679 invasive techniques that obviate the need for tissue sectioning or even allow  
680 measurements along different anatomical planes *in vivo*. Non-invasive methods such  
681 as confocal Brillouin microscopy and magnetic resonance elastography have been  
682 applied to many complex materials in order to extract physical properties such as  
683 tensile and compressive strain, elastic moduli and viscosity [22, 45-47]. Further  
684 technological advancements might render these methods applicable to adult  
685 zebrafish and expand our current understanding of mechanical signaling during  
686 spinal cord regeneration.

687 Moreover, AFM-based indentation experiments require a rather invasive sample  
688 preparation that includes the isolation of the spinal tissue from the organism and  
689 subsequent sectioning. While we have shown that our preparation preserves the  
690 viability of the cells in the tissue, these preparatory procedures could already alter  
691 the mechanical properties of the spinal cord present *in vivo*. For instance, the  
692 zebrafish spinal cord as a whole may be under tension in the living organism, which  
693 would not be detectable after dissection or tissue sectioning. The same argument is  
694 true for pulsatile blood flow through vessels that penetrate the spinal parenchyma.  
695 These factors contribute to the mechanical tissue properties, might provide additional  
696 signals to maintain cellular and tissue homeostasis, and might likewise affect tissue

697 regeneration and repair. Gefen and Margulies, for instance, showed that the  
698 mechanical properties of brain tissue *in vivo* differ from excised tissue only after  
699 repetitive, but not at the first indentation [48]. Weickenmeier et al. used magnetic  
700 resonance elastography and showed that brain tissue rapidly stiffens after death [49].  
701 As it is currently unclear how *in vivo* mechanical properties change post mortem,  
702 mechanical tissue properties must be measured *in vivo* to rule out any effects elicited  
703 by the death of the animal. In fact, a recent publication from our lab employed a  
704 custom-built confocal Brillouin microscopy setup and showed that spinal cord injury  
705 and repair in living zebrafish larvae coincides with significant Brillouin shift changes.  
706 After spinal cord transection, the Brillouin shifts, corresponding to the longitudinal  
707 elastic modulus of the material, measured in the lesion site decreased and gradually  
708 increased thereafter [47]. This seemingly contrasts our AFM-based indentation  
709 results obtained *ex vivo*. However, both studies differ with respect to multiple  
710 experimental parameters such as the age of the specimens and possibly  
711 corresponding regenerative capacities or direction of measurement. Furthermore,  
712 zebrafish must be sedated by immersion in tricaine containing media for confocal  
713 Brillouin microscopy, which could induce acidification and change mechanical tissue  
714 properties as previously reported [50, 51]. Yet another aspect is the interpretation of  
715 the longitudinal modulus acquired by Brillouin microscopy as it measures on very  
716 short time (GHz) and length scales, whereas AFM provides information on much  
717 larger time (Hz) and length scales. Thus, longitudinal and Young's modulus must not  
718 necessarily correlate (for further discussion see [47]). However, as mechanical  
719 measurements appear to be dependent on several experimental parameters, the  
720 above-mentioned controversies emphasize the need for further investigations of  
721 mechanical tissue properties across all spatio-temporal scales.

722 **Conclusion**

723 Traumatic spinal cord injury in humans is accompanied by an irreversible impair of  
724 information exchange between the brain and the periphery of the body. Depending  
725 on the severity of the injury and its location on the spinal cord, patients may suffer  
726 from a partial or complete loss of sensory function and motor control of extremities  
727 and/or body compartments. While great effort has been made to identify and  
728 eradicate biochemical signals that are inhibitory for nerve fiber growth, functional  
729 repair and tissue restoration, there is no treatment yet to achieve complete recovery  
730 after spinal cord injury [52]. The mechanical characterization of the regenerating,  
731 adult zebrafish spinal cord, as presented in this study, constitutes a novel,  
732 interdisciplinary approach to assess and interpret the mechanisms that govern the  
733 cellular response during successful spinal cord repair. It is the first detailed study of  
734 the evolution of mechanical properties in adult zebrafish after spinal cord injury and  
735 documents the spatio-temporal changes of mechanical tissue properties provided by  
736 the spinal cord tissue to nerve cells and supporting cell residing in the tissue. This  
737 work will serve as a basis for future studies to link spinal cytoarchitecture before and  
738 after injury to tissue stiffness with the ultimate goal of tuning spinal cord tissue  
739 mechanics towards successful functional repair also in humans.



740 **Author contributions**

741 J.G., S.M., M.B. and V.K. conceived the project. S.M. designed and performed  
742 sample preparation, indentation experiments, and data evaluation. S.M. and M.K.  
743 performed immunohistochemistry and imaging. M.K. performed image analyses.  
744 S.M. and T.H. performed viability assays. S.M. performed animal experiments. S.A.  
745 developed a python script for data representation. A.T. and V.K. advised on animal  
746 experiments and indentation measurements, respectively. M.B. provided animals and  
747 methodology for animal experiments. J.G. supervised the project. S.M. and J.G.  
748 wrote the manuscript. All authors reviewed the manuscript.

749

750 **Acknowledgements**

751 We thank the fish facility at BIOTEC, TU Dresden for excellent fish care, JPK  
752 Instruments, Berlin for technical support, the light microscopy facility at CMCB, TU  
753 Dresden, and Benoit Lombardot, MPI CBG Dresden, for support with image analysis.  
754 We thank Andreas Christ for the MatLab Script for elasticity map analysis. We thank  
755 Daniel Wehner, Michell Reimer, Kristian Franze, Andreas Christ and Elke Ulbricht for  
756 fruitful discussions. Work by V.K. and M.B. was supported by the European Union  
757 (ERA-NET NEURON NeuroNiche project 01EW1708) and ERC advanced grant (Zf-  
758 BrainReg) to MB. Financial support from the Alexander-von-Humboldt Stiftung  
759 (Humboldt-Professorship to J.G.) and the Sächsisches Ministerium für Wissenschaft  
760 und Kunst (European Fund for Regional Development — EFRE to the light  
761 microscopy and electron microscopy facilities at CMCB, TU Dresden) is gratefully  
762 acknowledged.

763 **References**

- 764 1. Verma, P. and J. Fawcett, *Spinal cord regeneration*. Adv Biochem Eng  
765 Biotechnol, 2005. **94**: p. 43-66.
- 766 2. Fawcett, J.W. and R.A. Asher, *The glial scar and central nervous system*  
767 *repair*. Brain Res Bull, 1999. **49**(6): p. 377-91.
- 768 3. Cregg, J.M., et al., *Functional regeneration beyond the glial scar*. Exp  
769 Neurol, 2014. **253C**: p. 197-207.
- 770 4. Silver, J. and J.H. Miller, *Regeneration beyond the glial scar*. Nat Rev  
771 Neurosci, 2004. **5**(2): p. 146-56.
- 772 5. Vajn, K., et al., *Temporal profile of endogenous anatomical repair and*  
773 *functional recovery following spinal cord injury in adult zebrafish*. PLoS  
774 One, 2014. **9**(8): p. e105857.
- 775 6. Becker, C.G. and T. Becker, *Model Organisms in Spinal Cord Regeneration*.  
776 2007: Wiley.
- 777 7. Hui, S.P., A. Dutta, and S. Ghosh, *Cellular response after crush injury in adult*  
778 *zebrafish spinal cord*. Dev Dyn, 2010. **239**(11): p. 2962-79.
- 779 8. Reimer, M.M., et al., *Motor neuron regeneration in adult zebrafish*. Journal  
780 of Neuroscience, 2008. **28**(34): p. 8510-8516.
- 781 9. Goldshmit, Y., et al., *Fgf-Dependent Glial Cell Bridges Facilitate Spinal Cord*  
782 *Regeneration in Zebrafish*. Journal of Neuroscience, 2012. **32**(22): p. 7477-  
783 7492.
- 784 10. Becker, T. and C.G. Becker, *Regenerating descending axons preferentially*  
785 *reroute to the gray matter in the presence of a general*  
786 *macrophage/microglial reaction caudal to a spinal transection in adult*  
787 *zebrafish*. J Comp Neurol, 2001. **433**(1): p. 131-47.
- 788 11. Kuscha, V., et al., *Lesion-induced generation of interneuron cell types in*  
789 *specific dorsoventral domains in the spinal cord of adult zebrafish*. Journal  
790 of Comparative Neurology, 2012. **520**(16): p. 3604-3616.
- 791 12. Becker, T., et al., *Axonal regrowth after spinal cord transection in adult*  
792 *zebrafish*. Journal of Comparative Neurology, 1997. **377**(4): p. 577-595.
- 793 13. Wehner, D., et al., *Wnt signaling controls pro-regenerative Collagen XII in*  
794 *functional spinal cord regeneration in zebrafish*. Nat Commun, 2017. **8**(1):  
795 p. 126.
- 796 14. Flanagan, L.A., et al., *Neurite branching on deformable substrates*.  
797 Neuroreport, 2002. **13**(18): p. 2411-2415.
- 798 15. Jagielska, A., et al., *Mechanical environment modulates biological properties*  
799 *of oligodendrocyte progenitor cells*. Stem Cells Dev, 2012. **21**(16): p. 2905-  
800 14.
- 801 16. Moshayedi, P., et al., *Mechanosensitivity of astrocytes on optimized*  
802 *polyacrylamide gels analyzed by quantitative morphometry*. J Phys  
803 Condens Matter, 2010. **22**(19): p. 194114.
- 804 17. Moshayedi, P., et al., *The relationship between glial cell mechanosensitivity*  
805 *and foreign body reactions in the central nervous system*. Biomaterials,  
806 2014. **35**(13): p. 3919-25.
- 807 18. Koser, D.E., et al., *Mechanosensing is critical for axon growth in the*  
808 *developing brain*. Nat Neurosci, 2016. **19**(12): p. 1592-1598.
- 809 19. Lu, Y.B., et al., *Viscoelastic properties of individual glial cells and neurons in*  
810 *the CNS*. Proc Natl Acad Sci U S A, 2006. **103**(47): p. 17759-64.

- 811 20. Koser, D.E., et al., *Predicting local tissue mechanics using*  
812 *immunohistochemistry*. bioRxiv, 2018: p. 358119.
- 813 21. Iwashita, M., et al., *Systematic profiling of spatiotemporal tissue and*  
814 *cellular stiffness in the developing brain*. Development, 2014. **141**(19): p.  
815 3793-8.
- 816 22. Sack, I., et al., *Structure-sensitive elastography: on the viscoelastic*  
817 *powerlaw behavior of in vivo human tissue in health and disease*. Soft  
818 Matter, 2013. **9**(24): p. 5672-5680.
- 819 23. Millward, J.M., et al., *Tissue structure and inflammatory processes shape*  
820 *viscoelastic properties of the mouse brain*. NMR Biomed, 2015. **28**(7): p.  
821 831-9.
- 822 24. Moeendarbary, E., et al., *The soft mechanical signature of glial scars in the*  
823 *central nervous system*. Nat Commun, 2017. **8**: p. 14787.
- 824 25. Eberle, D., et al., *Acute but not inherited demyelination in mouse models*  
825 *leads to brain tissue stiffness changes*. bioRxiv, 2018: p. 449603.
- 826 26. Brand, M., M. Granato, and C. Nüsslein-Volhard, *Keeping and raising*  
827 *zebrafish*. Practical approach series. Vol. 261. 2002: Oxford University  
828 Press.
- 829 27. Jung, S.H., et al., *Visualization of myelination in GFP-transgenic zebrafish*.  
830 Dev Dyn, 2010. **239**(2): p. 592-7.
- 831 28. Wilson, J.M., R.M. Bunte, and A.J. Carty, *Evaluation of Rapid Cooling and*  
832 *Tricaine Methanesulfonate (MS222) as Methods of Euthanasia in Zebrafish*  
833 *(Danio rerio)*. Journal of the American Association for Laboratory Animal  
834 Science, 2009. **48**(6): p. 785-789.
- 835 29. Masino, M.A. and J.R. Fetcho, *Fictive swimming motor patterns in wild type*  
836 *and mutant larval zebrafish*. Journal of Neurophysiology, 2005. **93**(6): p.  
837 3177-3188.
- 838 30. Hutter, J.L. and J. Bechhoefer, *Calibration of atomic-force microscope tips*.  
839 Review of Scientific Instruments, 1993. **64**(7): p. 1868-1873.
- 840 31. Hertz, H., *Ueber die Berührung fester elastischer Körper*. Journal für die  
841 reine und angewandte Mathematik, 1881. **92**: p. 156-171.
- 842 32. Sneddon, I.N., *The relation between load and penetration in the*  
843 *axisymmetric boussinesq problem for a punch of arbitrary profile*.  
844 International Journal of Engineering Science, 1965. **3**(1): p. 47-57.
- 845 33. *Determining the elastic modulus of biological samples using the atomic*  
846 *force microscope*. Available from: [https://http://www.jpk.com/app-](https://http://www.jpk.com/app-technotes-img/AFM/pdf/jpk-app-elastic-modulus.14-1.pdf)  
847 [technotes-  
img/AFM/pdf/jpk-app-elastic-modulus.14-1.pdf](https://http://www.jpk.com/app-technotes-img/AFM/pdf/jpk-app-elastic-modulus.14-1.pdf).
- 848 34. Bolte, S. and F.P. Cordelieres, *A guided tour into subcellular colocalization*  
849 *analysis in light microscopy*. J Microsc, 2006. **224**(Pt 3): p. 213-32.
- 850 35. Schindelin, J., et al., *Fiji: an open-source platform for biological-image*  
851 *analysis*. Nat Methods, 2012. **9**(7): p. 676-82.
- 852 36. Scott, D.W., *Multivariate Density Estimation: Theory, Practice, and*  
853 *Visualization*. 2015: Wiley.
- 854 37. Stil, A. and P. Drapeau, *Neuronal labeling patterns in the spinal cord of*  
855 *adult transgenic Zebrafish*. Dev Neurobiol, 2016. **76**(6): p. 642-60.
- 856 38. Koser, D.E., et al., *CNS cell distribution and axon orientation determine local*  
857 *spinal cord mechanical properties*. Biophys J, 2015. **108**(9): p. 2137-47.

- 858 39. Christ, A.F., et al., *Mechanical difference between white and gray matter in*  
859 *the rat cerebellum measured by scanning force microscopy*. Journal of  
860 Biomechanics, 2010. **43**(15): p. 2986-2992.
- 861 40. Franze, K., P.A. Janmey, and J. Guck, *Mechanics in Neuronal Development*  
862 *and Repair*. Annu Rev Biomed Eng, 2013. **15**: p. 227-251.
- 863 41. Becker, T. and C.G. Becker, *Regenerating descending axons preferentially*  
864 *reroute to the gray matter in the presence of a general*  
865 *macrophage/microglial reaction caudal to a spinal transection in adult*  
866 *zebrafish*. Journal of Comparative Neurology, 2001. **433**(1): p. 131-147.
- 867 42. Diekmann, H., et al., *Analysis of the reticulon gene family demonstrates the*  
868 *absence of the neurite growth inhibitor Nogo-A in fish*. Mol Biol Evol, 2005.  
869 **22**(8): p. 1635-48.
- 870 43. Abdesselem, H., et al., *No Nogo66- and NgR-mediated inhibition of*  
871 *regenerating axons in the zebrafish optic nerve*. J Neurosci, 2009. **29**(49):  
872 p. 15489-98.
- 873 44. Reimer, M.M., et al., *Dopamine from the brain promotes spinal motor*  
874 *neuron generation during development and adult regeneration*. Dev Cell,  
875 2013. **25**(5): p. 478-91.
- 876 45. Ballmann, C.W., et al., *Stimulated Brillouin Scattering Microscopic Imaging*.  
877 Sci Rep, 2015. **5**: p. 18139.
- 878 46. Scarcelli, G. and S.H. Yun, *In vivo Brillouin optical microscopy of the human*  
879 *eye*. Opt Express, 2012. **20**(8): p. 9197-202.
- 880 47. Schlüssler, R., et al., *Mechanical Mapping of Spinal Cord Growth and Repair*  
881 *in Living Zebrafish Larvae by Brillouin Imaging*. Biophys J, 2018. **115**(5): p.  
882 911-923.
- 883 48. Gefen, A. and S.S. Margulies, *Are in vivo and in situ brain tissues*  
884 *mechanically similar?* Journal of Biomechanics, 2004. **37**(9): p. 1339-  
885 1352.
- 886 49. Weickenmeier, J., et al., *Brain stiffens post mortem*. Journal of the  
887 Mechanical Behavior of Biomedical Materials, 2018. **84**: p. 88-98.
- 888 50. Matthews, M. and Z.M. Varga, *Anesthesia and Euthanasia in Zebrafish*. Ilar  
889 Journal, 2012. **53**(2): p. 192-204.
- 890 51. Holtzmann, K., et al., *Brain tissue stiffness is a sensitive marker for acidosis*.  
891 J Neurosci Methods, 2016. **271**: p. 50-4.
- 892 52. NIH. 2016 12/1/2016; Available from:  
893 [https://http://www.nichd.nih.gov/health/topics/spinalinjury/conditioni](https://http://www.nichd.nih.gov/health/topics/spinalinjury/conditioninfo/treatments)  
894 [nfo/treatments](https://http://www.nichd.nih.gov/health/topics/spinalinjury/conditioninfo/treatments).  
895  
896
